# Supplementary material for: Genome-wide analyses of chitin synthases identify horizontal gene transfers towards bacteria and allow a robust and unifying classification into fungi
Source: PubMed Central journal article supplement (PMC5122149; doi:10.1186/s12862-016-0815-9), 2016-11-24

Fig. S9

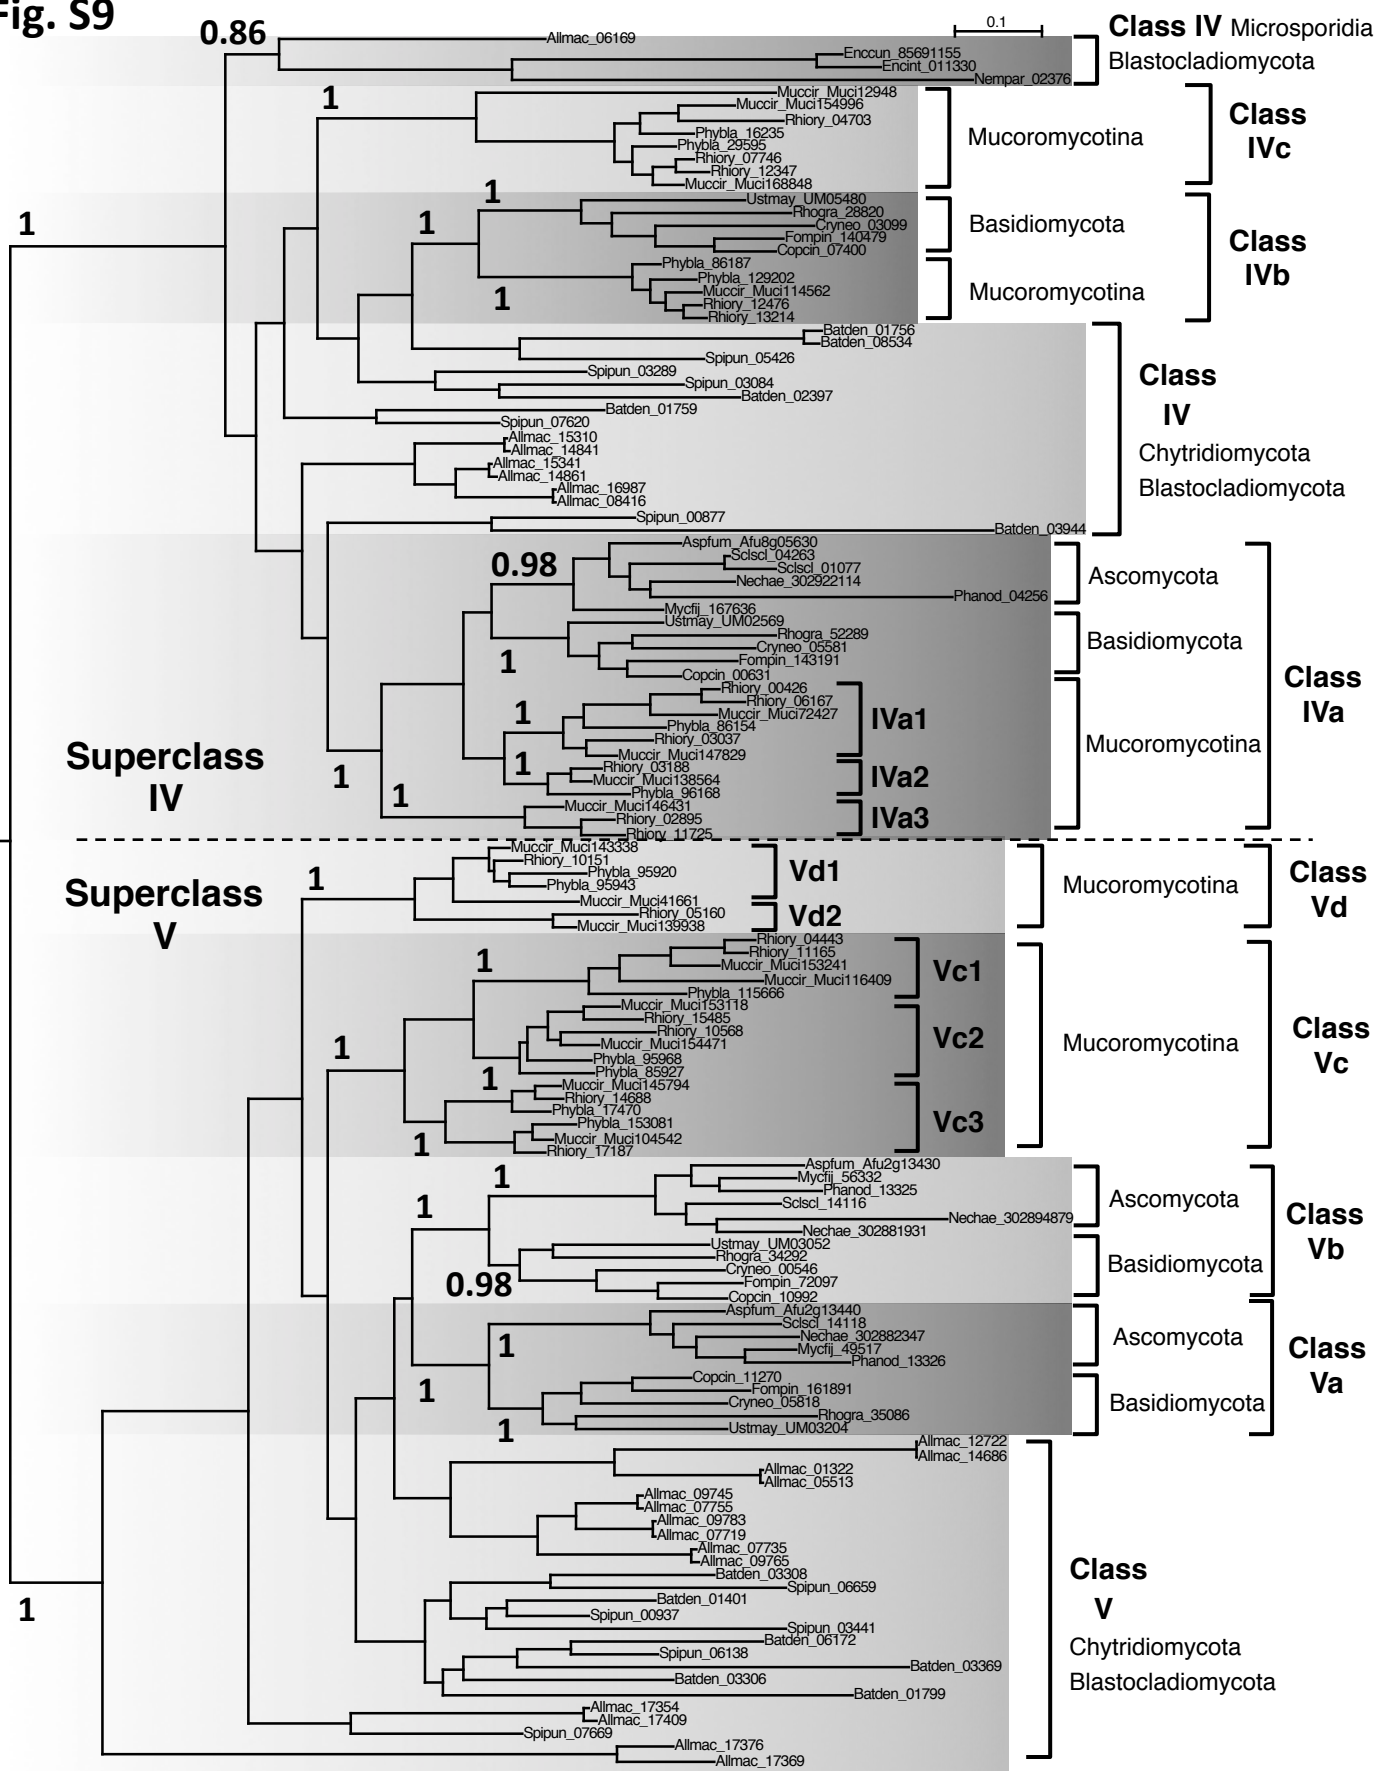

Supplement: 12862_2016_815_MOESM19_ESM.pdf [file 12862_2016_815_MOESM19_ESM.pdf]
